# Supplementary material for: Antibacterial Activity and the Mechanism of the Z-Scheme Bi2MoO6/Bi5O7I Heterojunction under Visible Light
Source: MDPI journal article supplement (doi:10.3390/molecules28196786), 2023-09-24
Supplement: s1 [file s1]

## Supporting Information

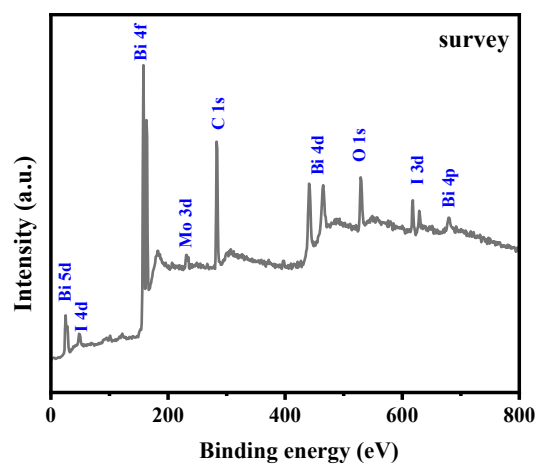

Fig. S1 XPS survey spectrum of BM/BI-3.

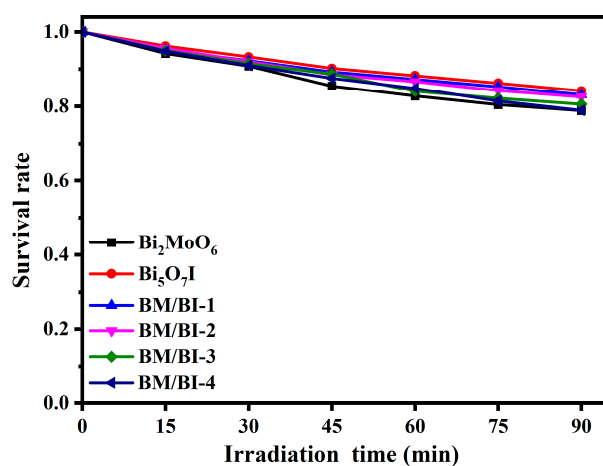

Fig. S2 Antibacterial activities of synthesized samples under dark.

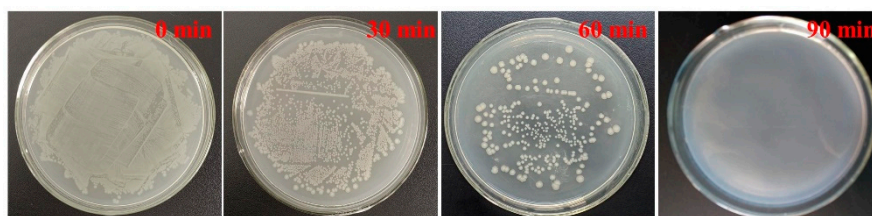

Fig. S3. Bacterial colonies of re-cultured *E. coli* treated with BM/BI-3 under different irradiation time.
